# Supplementary material for: Tuning the luminescent properties of a three-dimensional perovskite ferroelectric (Me-Hdabco)CsI3via Sn(ii) doping
Source: Royal Society of Chemistry journal article supplement (doi:10.1039/d2dt03939g), 2023-01-01
Supplement: d2dt03939g1.pdf [file d2dt03939g1.pdf]

# Electronic Supplementary Information

## Tuning the Luminescent Properties of a Three-Dimensional Perovskite Ferroelectric (Me-Hdabco)CsI<sub>3</sub> Via doping Sn(II)

Ze-Jie Wang,<sup>a</sup> Ling-Kun Wu,<sup>a</sup> Na Wang,<sup>a</sup> Qian-Qian Hu,<sup>b</sup> Jian-Rong Li<sup>\*a,b</sup> and Heng-Yun Ye<sup>a</sup>

<sup>a</sup> Chaotic Matter Science Research Center, Jiangxi University of Science and Technology, Ganzhou 341000, Jiangxi, P. R. China.

<sup>b</sup> State Key Laboratory of Structural Chemistry, Fujian Institute of Research on the Structure of Matter, Chinese Academy of Sciences, Fuzhou, Fujian 350002, China.

### \* Correspondence:

Corresponding Author: Jian-Rong Li, jrli@fjirsm.ac.cn

### 1 · Synthesis

Synthesis of (Me-Hdabco)CsI<sub>3</sub>: A mixture of Me-dabco (10 mmol, 2.54 g) (Me-dabco = N-methyl-1,4-Diazabicyclo[2.2.2]octane), CsI (10 mmol, 2.60 g), HI (47%, 10 mmol, 5.44 g), and H<sub>3</sub>PO<sub>2</sub> (1 mL) in 20 mL aqueous solution until a clear solution was formed. And the mixture solution was evaporated slowly at 303 K. After 3 days, the colorless and transparent bulk single-crystal of (Me-Hdabco)CsI<sub>3</sub>(**1**) was synthesized at the bottom of the beaker, (Yield: 5.45 g, 85% based on Cs). The purity was confirmed by powder X-ray diffraction (PXRD).

Synthesis of Sn-doping crystal: The Sn-doping crystal was synthesized by the similar conditions as **1**. For the detail for synthesis of Sn-doped samples: different Sn(II)-feeding concentrations of SnI<sub>2</sub> (1% Sn, 0.1 mmol; 5% Sn, 0.5 mmol; 10% Sn, 1 mmol; 20% Sn, 2 mmol) was added to the mixed solution of Me-dabco (10 mmol, 2.54 g) (Me-dabco = N-methyl-1,4-Diazabicyclo[2.2.2]octane), CsI (10 mmol, 2.60 g), HI (47%, 10 mmol, 5.44 g), and H<sub>3</sub>PO<sub>2</sub> (1 mL) and 20 mL deionized water, and then stirred until completely dissolved of SnI<sub>2</sub>. The mixed solution is filtered and after three days, colorless strip crystals tin-doping crystal were grown at the bottom of the beaker. And the rest Sn-doped crystals only need to be adjusted according to the doping amount.

### 2 · Measurement and Methods

#### 2.1 Crystal Structure Determination

All single-crystal X-ray diffraction data were collected on a Rigaku synergistic diffractometer with Mo-K $\alpha$  ( $\lambda = 0.71073$  Å) radiation from a graphite monochromator, and the crystal structure were solved using the direct method and refined based on the least square method by the Olex2 software equipped with ShelXL programs.

#### 2.2 PXRD Measurements

Powder X-ray diffraction patterns were recorded on a Rigaku DMax 2500 powder diffractometer. Measurement angle ranges from 5° to 50° with step size of 0.02° and

scanning speed 2°/min.

### 2.3 Variable-temperature Dielectric Permittivity Measurement

The dielectric measurements were carried on Tonghui TH2828A impedance analyzer. Silver conducting paste deposited on the plate surfaces was used as electrodes on pressed-powder pellets.

### 2.4 Differential Scanning Calorimetry (DSC) measurement

Differential scanning calorimetry (DSC) measurement was performed using a Netzsch differential scanning calorimetry 214 Polyma under nitrogen atmosphere at atmospheric pressure, and the heating-cooling rate is 20 K min<sup>-1</sup>.

The calculation of  $\Delta S$  and  $N$  for **1**.

$$\Delta S = \int_{T_2}^{T_1} \frac{Q}{T} dT \approx \frac{\Delta H}{T_c} = 8.784 \quad \text{J mol}^{-1} \text{ K}^{-1}$$

$$N = \exp\left(\frac{\Delta S}{R}\right) = 2.877$$

### 2.5 TG Measurement

Thermogravimetry (TG) analyses were recorded on a NETZSCH STA 449F3 instrument in the temperature range from 300 K to 900 K with a heating rate of 10 K·min<sup>-1</sup> under a dry N<sub>2</sub> atmosphere.

### 2.6 Photoluminescence Properties Measurement

Steady-state PL emission and PL excitation (PLE) spectra were measured using a PL spectrometer (FLS980; Edinburgh Instruments). Temperature-dependent steady-state and TRPL spectra were recorded by using a FLS980 spectrometer (Edinburgh) equipped with a continuous xenon lamp (450 W), a pulsed flash lamp, and a 375 nm picosecond pulsed laser. The absolute PL quantum yields (QYs) of single crystals were measured by using a standard BaSO<sub>4</sub>-coated integrating sphere (150 mm diameter, Edinburgh) as the sample chamber mounted on a FLS980 spectrometer.

### 2.7 SHG Measurement

The SHG measurement were performed by an unexpanded laser beam with low divergence in the temperature range from 300 K to 475 K. The instrument model is Ins 1210058, INSTEC Instruments and the laser is Vibrant 355 II, OPOTEK.

### 2.8 PFM Measurement

Preparation of thin film samples for (Me-Hdabco)CsI<sub>3</sub> and Sn(II): (Me-Hdabco)CsI<sub>3</sub> at 10% Sn(II)-feeding concentration: 100 mg crystal sample was dissolved in 1 mL deionized water, then 20 uL was dropped onto ITO glass and slowly volatilized at room temperature to obtain the thin film samples of (Me-Hdabco)CsI<sub>3</sub> and 10% Sn(II): (Me-Hdabco)CsI<sub>3</sub>.

Nanoscale polarization imaging and local switching spectroscopy were carried out using a resonant-enhanced piezoresponse force microscopy (MFP-3D, Asylum Research) on single-crystal film sample. Conductive Pt/Ir-coated silicon probes (EFM-50, Nanoworld) were used for domain imaging and polarization switching studies. To verify the piezoresponse, we applied a 10 V AC driving voltage on the sample to measure the normal and shear responses, with the AC frequency set at the second resonant peak of cantilever-sample system to enhance the sensitivity. The measurement was carried out on the single-crystal slices. To obtain a domain structure, the sample was heated to about 460 K, and then cooled slowly.

## **2.9 XPS and EDS Measurement**

XPS measurements were performed on ESCALAB 250Xi. The EDS measurements were performed on American EDAX Oribis Micobeam X-ray Fluorescence Spectrometer Micro XRF.

## 2 · Supporting Figures

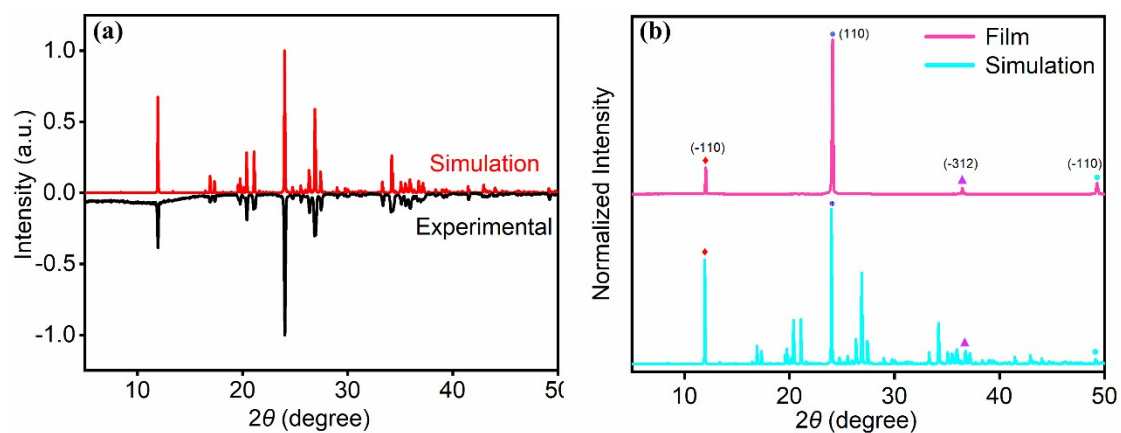

**Fig. S1** PXR D patterns of (Me-Hdabco)CsI<sub>3</sub> compared with that simulated one from single crystal X-ray structures, (a) crystal sample and (b) the film sample.

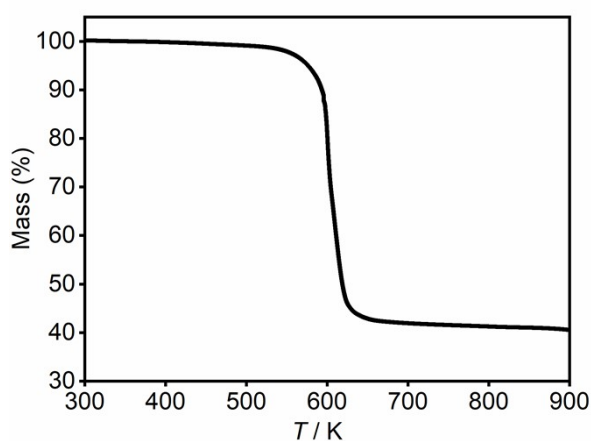

**Fig. S2** The TG curve of (Me-Hdabco)CsI<sub>3</sub> (1).

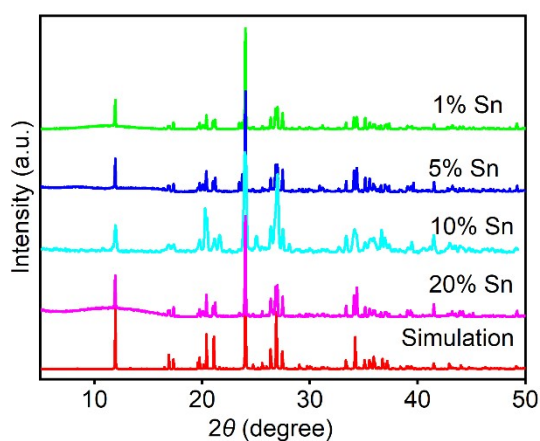

**Fig. S3** PXR D patterns of Sn(II): (Me-Hdabco)CsI<sub>3</sub> with different Sn(II)-feeding concentrations.

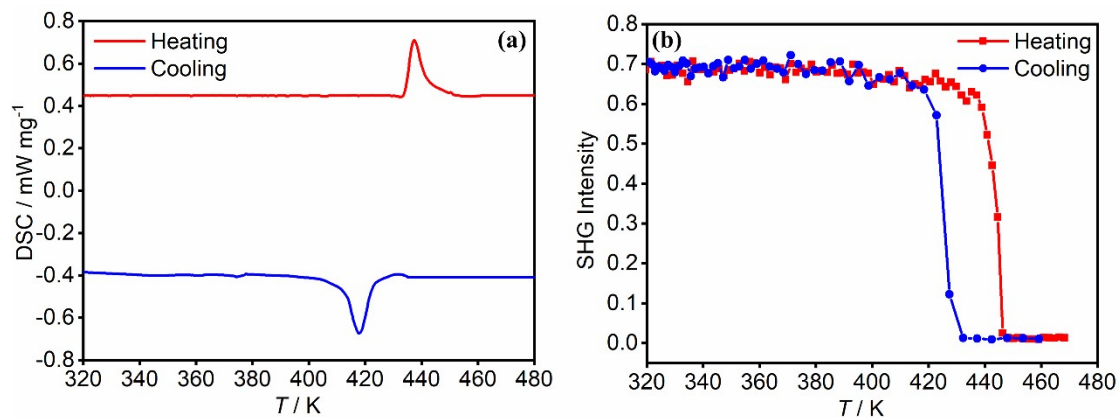

**Fig. S4** Symmetry-breaking phase transition in 10% Sn(II):(Me-Hdabco)CsI<sub>3</sub>: (a) DSC curves and (b) temperature-dependent SHG response obtained in a heating-cooling cycle.

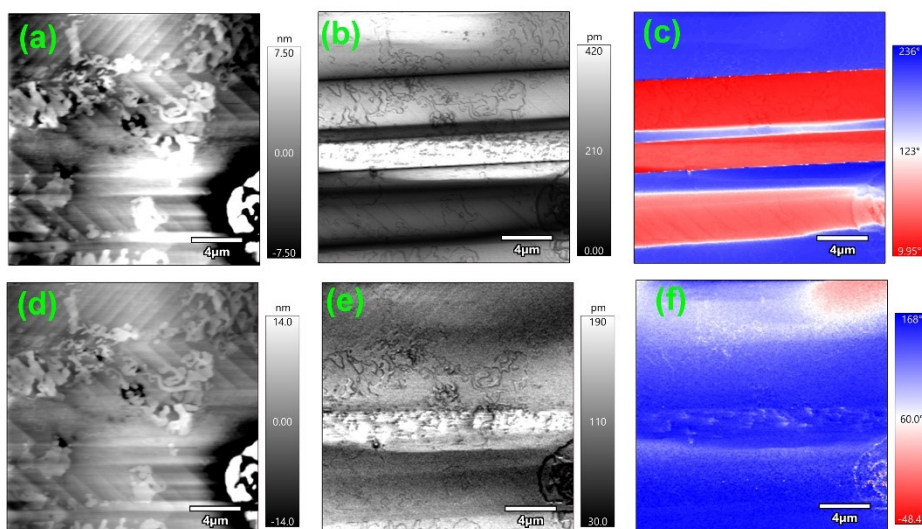

**Fig. S5** Domains observed in the as-grown thin film at 10% Sn(II):(Me-Hdabco)CsI<sub>3</sub>. Surface topography images (a, d). Vertical and lateral PFM amplitude (b, e) and phase (c, f) images.

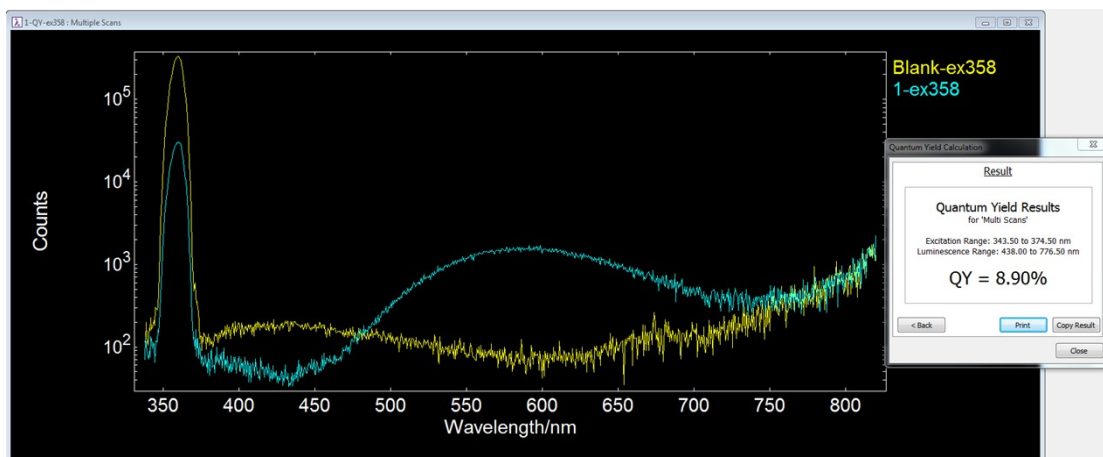

**Fig. S6** The fluorescence quantum yield of Sn(II):(Me-Hdabco)CsI<sub>3</sub> with 10% Sn(II)-feeding crystal.

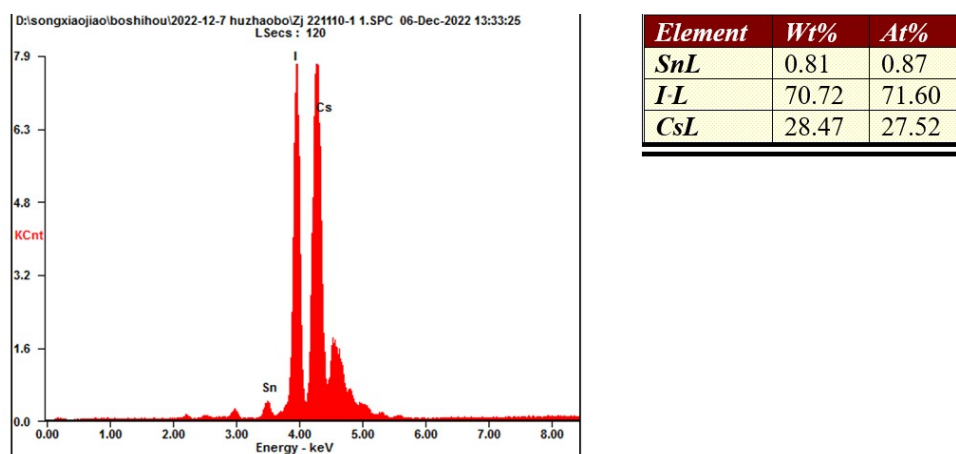

**Fig. S7** EDX spectrum of 10% Sn(II):(Me-Hdabco)CsI<sub>3</sub>.

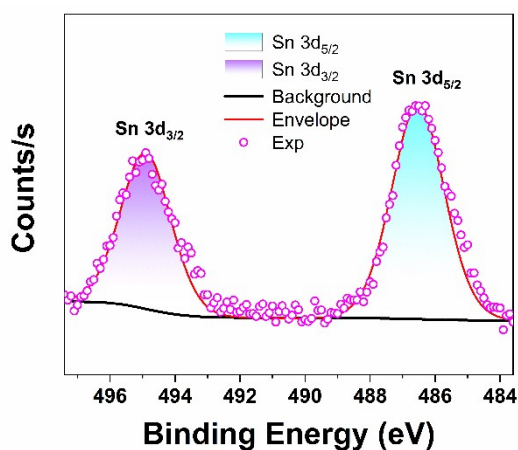

**Fig. S8** XPS spectrum of 10% Sn(II):(Me-Hdabco)CsI<sub>3</sub>.

### 3 · Supporting Table

**Table S1** Crystallographic data and structure refinements of (Me-Hdabco)CsI<sub>3</sub> (**1**).

| Temperature / K                            | <b>1</b> at 273 K                                                              | <b>1</b> at 453 K                                             |
|--------------------------------------------|--------------------------------------------------------------------------------|---------------------------------------------------------------|
| Formula                                    | C <sub>28</sub> H <sub>64</sub> N <sub>8</sub> Cs <sub>4</sub> I <sub>12</sub> | C <sub>4</sub> H <sub>9</sub> N <sub>2</sub> CsI <sub>3</sub> |
| Formula weight                             | 2567.31                                                                        | 598.74                                                        |
| Crystal system                             | Monoclinic                                                                     | Cubic                                                         |
| Space group                                | <i>Cc</i>                                                                      | <i>Pm</i> <sup>3</sup> <i>m</i>                               |
| <i>a</i> / Å                               | 20.4211(9)                                                                     | 7.4727(18)                                                    |
| <i>b</i> / Å                               | 21.4617(8)                                                                     | 7.4727(18)                                                    |
| <i>c</i> / Å                               | 14.8276(6)                                                                     | 7.4727(18)                                                    |
| $\beta$ / °                                | 90.481(3)                                                                      | 90                                                            |
| Volume / Å <sup>3</sup>                    | 6498.3(5)                                                                      | 417.3(3)                                                      |
| <i>Z</i>                                   | 4                                                                              | 1                                                             |
| $\rho_{\text{calc}}$ /cm <sup>3</sup>      | 2.624                                                                          | 2.383                                                         |
| $\mu$ / mm <sup>-1</sup>                   | 7.953                                                                          | 7.731                                                         |
| <i>F</i> (000)                             | 4576.0                                                                         | 261.0                                                         |
| $2\theta$                                  | 3.9-58.718                                                                     | 5.452-59.836                                                  |
|                                            | -26 $\leq h \leq$ 23                                                           | -8 $\leq h \leq$ 9                                            |
| Index ranges                               | -29 $\leq k \leq$ 24                                                           | -9 $\leq k \leq$ 9                                            |
|                                            | -19 $\leq l \leq$ 17                                                           | -8 $\leq l \leq$ 10                                           |
| Goodness-of-fit on <i>F</i> <sup>2</sup>   | 1.085                                                                          | 1.113                                                         |
| Final <i>R</i> indexes                     | <i>R</i> <sub>1</sub> = 0.0527                                                 | <i>R</i> <sub>1</sub> = 0.0541                                |
| [ <i>I</i> $\geq$ 2 $\sigma$ ( <i>I</i> )] | <i>wR</i> <sub>2</sub> = 0.1507                                                | <i>wR</i> <sub>2</sub> = 0.1615                               |
| Final <i>R</i> indexes [all data]          | <i>R</i> <sub>1</sub> = 0.0654                                                 | <i>R</i> <sub>1</sub> = 0.0633                                |
|                                            | <i>wR</i> <sub>2</sub> = 0.1580                                                | <i>wR</i> <sub>2</sub> = 0.1677                               |
| Reflections collected                      | 20564                                                                          | 2693                                                          |
| CCDC                                       | 2225022                                                                        | 2225021                                                       |

**Table S2** Crystallographic data and structure refinements of Sn(II):(Me-Hdabco)CsI<sub>3</sub> with different Sn<sup>2+</sup>-feeding.

| Temperature / K                          | 5% Sn at 299 K                                                                 | 10% Sn at 299 K                                                               | 10% Sn at 455 K                                                   |
|------------------------------------------|--------------------------------------------------------------------------------|-------------------------------------------------------------------------------|-------------------------------------------------------------------|
| Formula                                  | C <sub>28</sub> H <sub>64</sub> N <sub>8</sub> Cs <sub>4</sub> I <sub>12</sub> | C <sub>14</sub> H <sub>28</sub> N <sub>4</sub> Cs <sub>2</sub> I <sub>6</sub> | C <sub>7</sub> H <sub>28</sub> N <sub>4</sub> CsI <sub>36</sub>   |
| Formula weight                           | 2567.31                                                                        | 1279.62                                                                       | 597.67                                                            |
| Crystal system                           | Monoclinic                                                                     | Orthorhombic                                                                  | Cubic                                                             |
| Space group                              | <i>Cc</i>                                                                      | <i>Aea2</i>                                                                   | <i>Pm</i> <sup>3</sup> <i>m</i>                                   |
| <i>a</i> / Å                             | 20.4486(8)                                                                     | 14.8438(3)                                                                    | 7.4849(5)                                                         |
| <i>b</i> / Å                             | 21.4876(7)                                                                     | 21.4841(4)                                                                    | 7.4849(5)                                                         |
| <i>c</i> / Å                             | 14.8333(4)                                                                     | 20.4535(5)                                                                    | 7.4849(5)                                                         |
| $\beta$ / °                              | 90                                                                             | 90                                                                            | 90                                                                |
| Volume / Å <sup>3</sup>                  | 6517.6(4)                                                                      | 6518.8(2)                                                                     | 419.33(8)                                                         |
| <i>Z</i>                                 | 4                                                                              | 8                                                                             | 1                                                                 |
| $\rho_{\text{calc}}$ /cm <sup>3</sup>    | 2.616                                                                          | 2.608                                                                         | 2.367                                                             |
| $\mu$ / mm <sup>-1</sup>                 | 7.929                                                                          | 7.927                                                                         | 7.700                                                             |
| <i>F</i> (000)                           | 4576.0                                                                         | 4544.0                                                                        | 256.0                                                             |
| $2\theta$                                | 3.79-62.14                                                                     | 3.792-49.998                                                                  | 5.442-59.43                                                       |
| Index ranges                             | -27 $\leq h \leq$ 28                                                           | -17 $\leq h \leq$ 17                                                          | -8 $\leq h \leq$ 3                                                |
|                                          | -30 $\leq k \leq$ 26                                                           | -25 $\leq k \leq$ 25                                                          | -10 $\leq k \leq$ 8                                               |
|                                          | -20 $\leq l \leq$ 20                                                           | -24 $\leq l \leq$ 24                                                          | -8 $\leq l \leq$ 9                                                |
| Goodness-of-fit on <i>F</i> <sup>2</sup> | 1.073                                                                          | 1.229                                                                         | 1.065                                                             |
| Final <i>R</i> indexes [I >= 2σ(I)]      | <i>R</i> <sub>1</sub> = 0.0527<br><i>wR</i> <sub>2</sub> = 0.1411              | <i>R</i> <sub>1</sub> = 0.0661<br><i>wR</i> <sub>2</sub> = 0.1479             | <i>R</i> <sub>1</sub> = 0.0490<br><i>wR</i> <sub>2</sub> = 0.1517 |
| Final <i>R</i> indexes [all data]        | <i>R</i> <sub>1</sub> = 0.0679<br><i>wR</i> <sub>2</sub> = 0.1499              | <i>R</i> <sub>1</sub> = 0.0685<br><i>wR</i> <sub>2</sub> = 0.1489             | <i>R</i> <sub>1</sub> = 0.0545<br><i>wR</i> <sub>2</sub> = 0.1603 |
| Reflections collected                    | 37930                                                                          | 49215                                                                         | 879                                                               |
| CCDC                                     | 2235373                                                                        | 2234582                                                                       | 2235374                                                           |



**Table S3** Cell parameters of Sn doping sample with different Sn<sup>2+</sup>-feeding.

|                   | 1% Sn -phase<br>1 | 1% Sn -<br>phase 2 | 5% Sn-<br>phase 1 | 5% Sn-<br>phase 2 | 10% Sn      | 20% Sn      |
|-------------------|-------------------|--------------------|-------------------|-------------------|-------------|-------------|
| $a / \text{Å}$    | 14.8302(7)        | 20.4551(9)         | 14.8406(8)        | 20.4486(8)        | 14.8438(3)  | 14.8425(5)  |
| $b / \text{Å}$    | 21.4697(12)       | 21.5128(9)         | 21.4937(9)        | 21.4876(7)        | 21.4841(4)  | 21.5009(9)  |
| $c / \text{Å}$    | 20.4675(15)       | 14.8213(7)         | 20.4532(12)       | 14.8333(4)        | 20.4535(5)  | 20.4308(9)  |
| $\alpha / ^\circ$ | 90                | 90                 | 90                | 90                | 90          | 90          |
| $\beta / ^\circ$  | 90                | 90                 | 90                | 90                | 90          | 90          |
| $\gamma / ^\circ$ | 90                | 90                 | 90                | 90                | 90          | 90          |
| $V / \text{Å}^3$  | 6522.1(15)        | 6522.1(5)          | 6524.1(6)         | 6517.6(4)         | 6518.8(2))  | 6520.1(5)   |
| Space<br>group    | <i>Aea2</i>       | <i>Cc</i>          | <i>Aea2</i>       | <i>Cc</i>         | <i>Aea2</i> | <i>Aea2</i> |
